# Supplementary material for: Dynamic Shear Deformation of a Precipitation Hardened Al<sub>0.7</sub>CoCrFeNi Eutectic High-Entropy Alloy Using Hat-Shaped Specimen Geometry
Source: Preprints.org preprint supplement (doi:10.20944/preprints202003.0154.v1), 2020-03-10
Supplement: Supplementary file 1 [file supplementary]

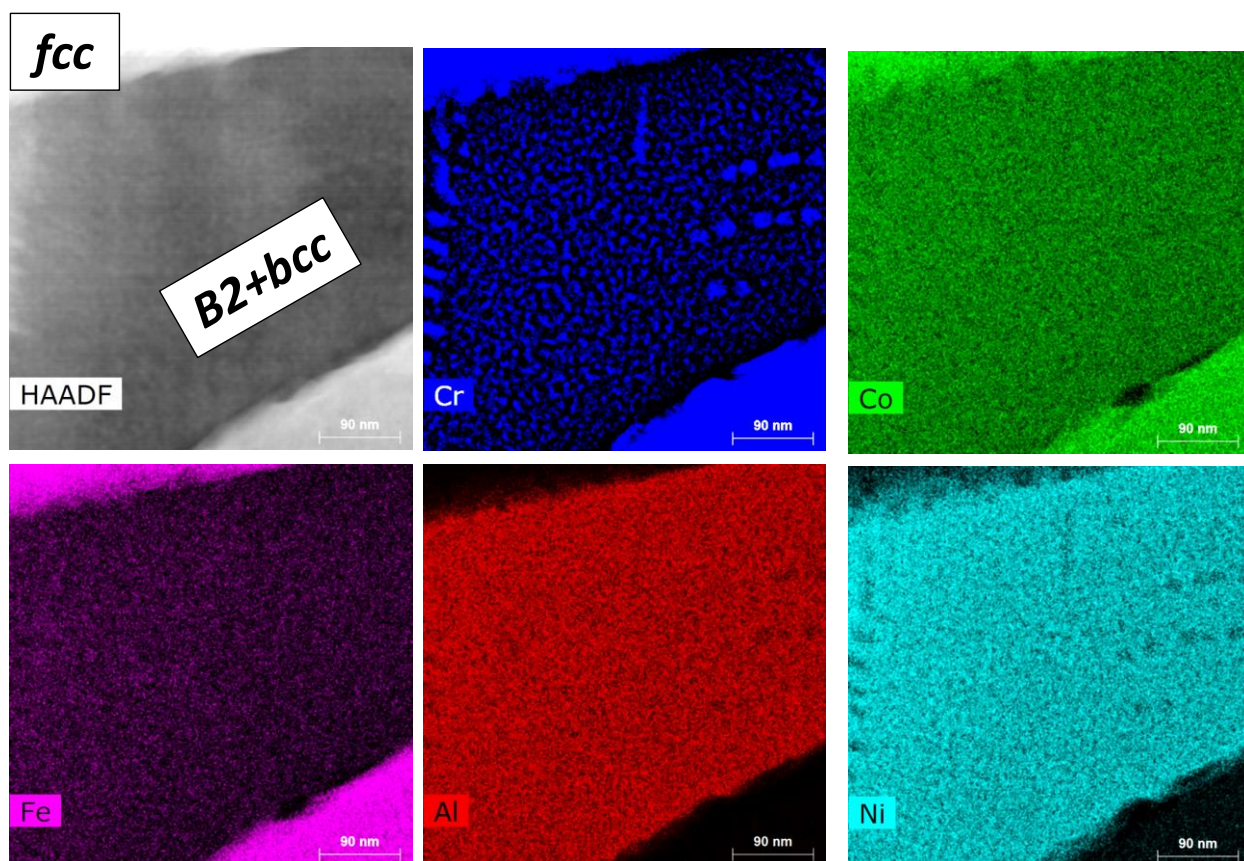

## Supplementary Figure 1

STEM EDS maps from the HTA condition showing the compositional partitioning in a region with a magnified view of *fcc* and B2 phase. The dark contrast phase in the STEM image is B2 phase (over all rich in Al and Ni), high density nano-scale bcc precipitates can be clearly seen in the Cr map shown in blue color.

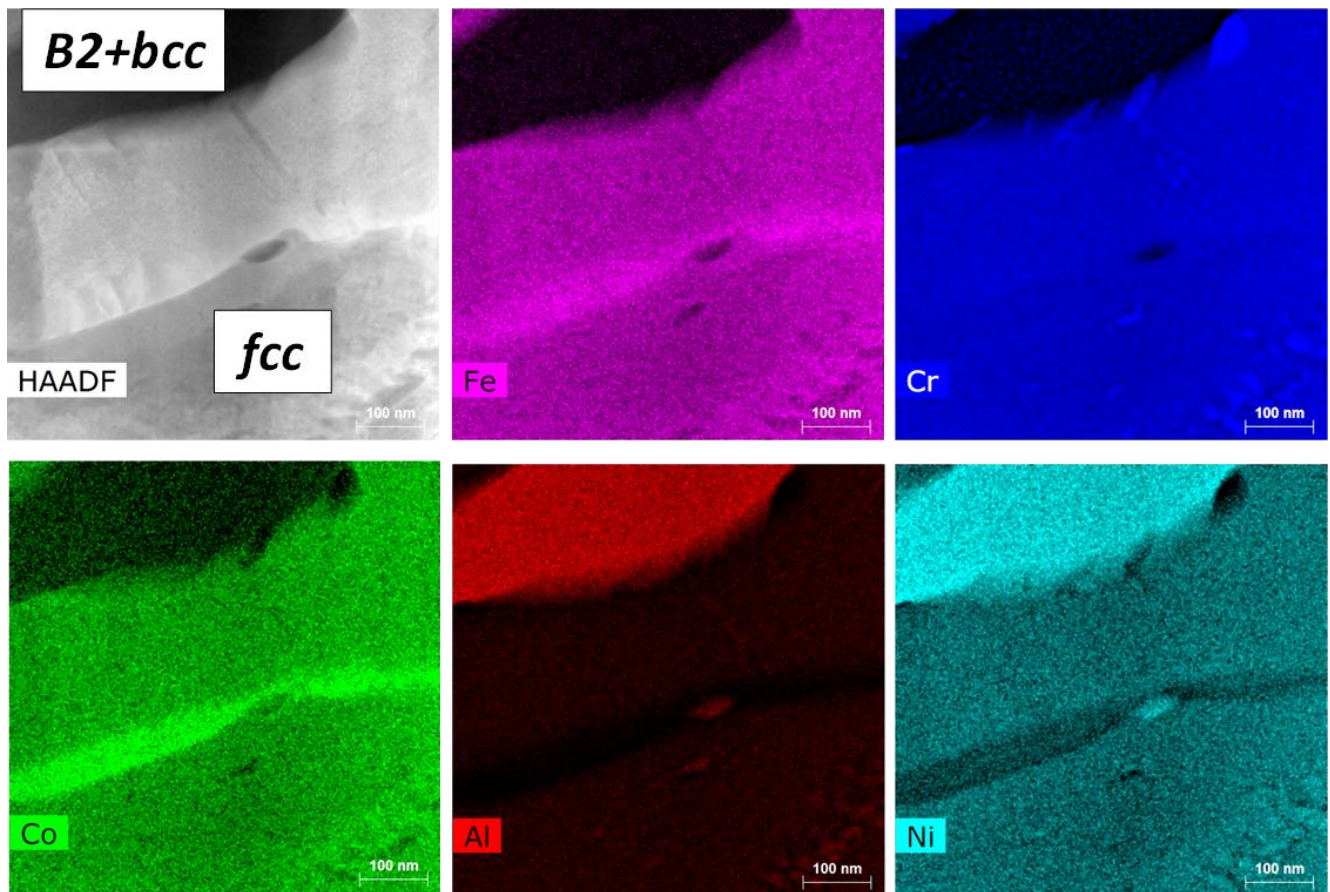

## Supplementary Figure 2

STEM EDS maps from the HTA condition showing the compositional partitioning in a region with a magnified view of *fcc* and B2 phase. The grey/bright contrast phase in the STEM image is *fcc* phase which is rich in Co, Cr and Al. No compositional fluctuation is evident in *fcc* phase in this heat treatment condition of the alloy.



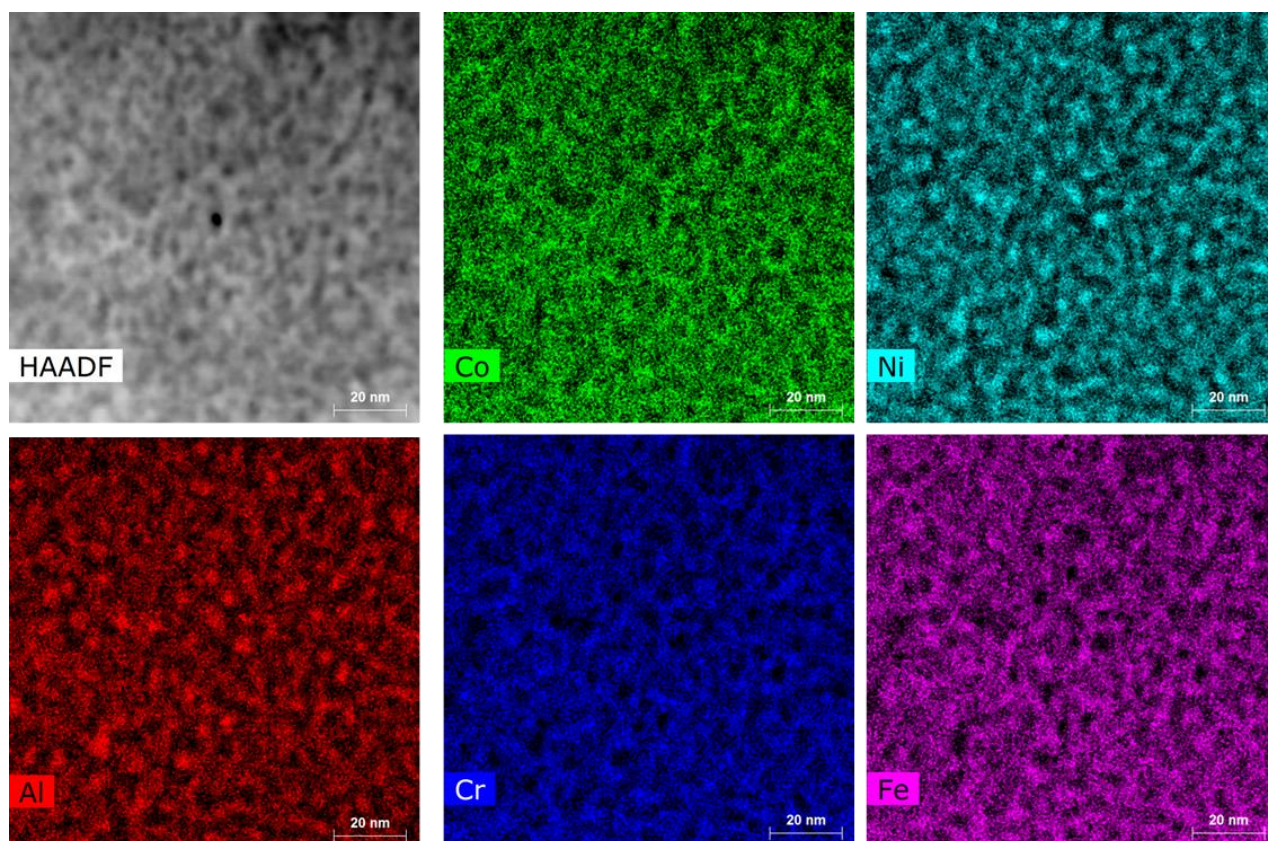

## Supplementary Figure 3

STEM EDS maps from the HTA-580 condition showing the compositional partitioning in a region with a magnified view of *fcc* phase. The compositional fluctuations are evidently seen in *fcc* phase in STEM image (bright and dark contrast). The Al-Ni rich regions correspond to the  $L1_2$  phase formed in this condition after the heat treatment at 580 °C for 24 h.

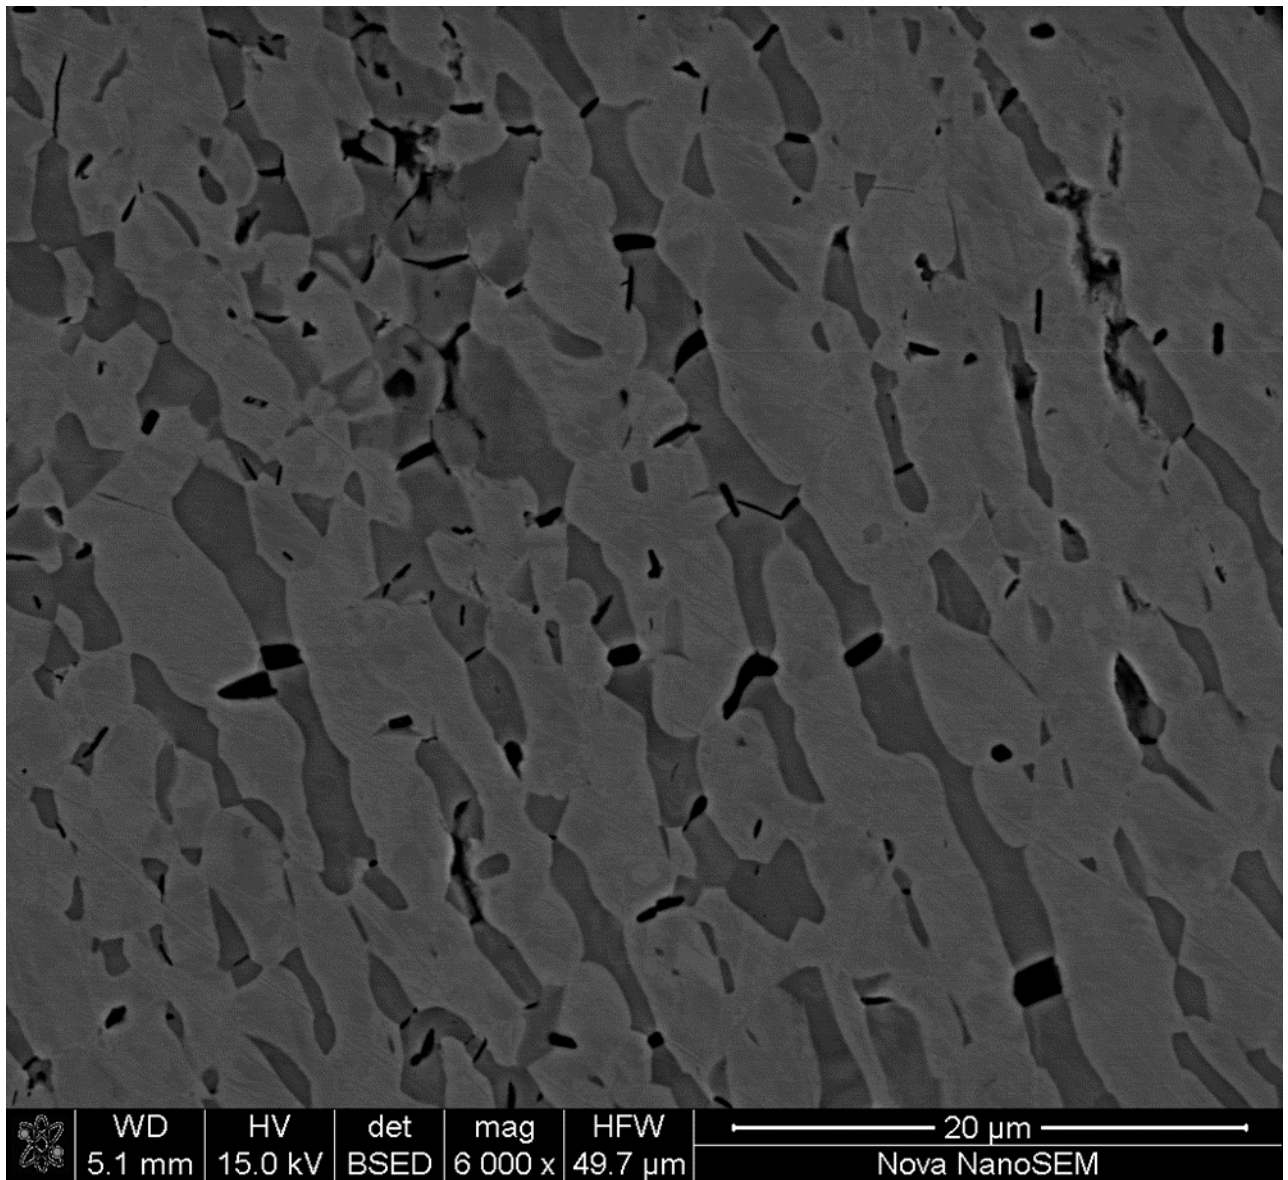

## Supplementary Figure 4

SEM image from the fracture HTA:40psi sample. Note that the cracks are limited in the dark contrast B2 phase and are broadened to accommodate the plastic flow in fcc phase.

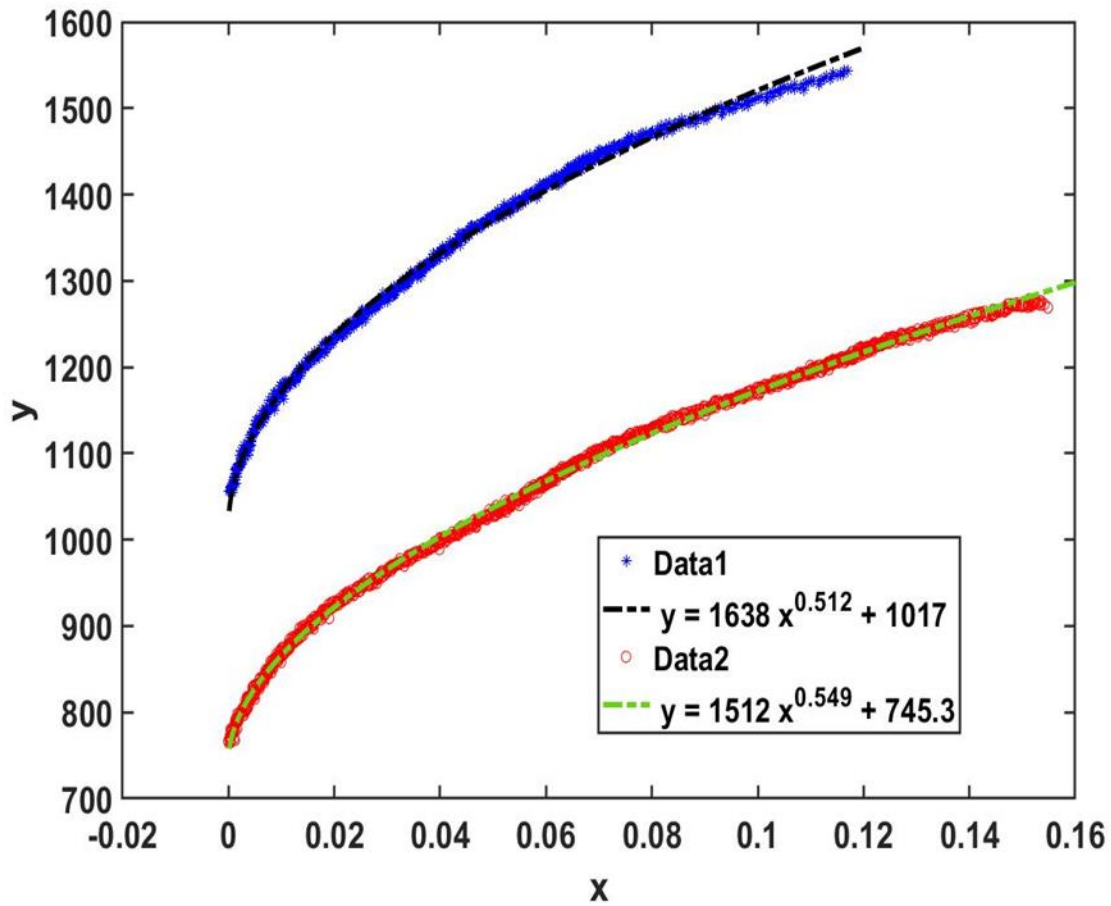

## Supplementary Figure 5

Curve fitting using the equation  $\sigma = k\epsilon^n$  (power law) for true stress-strain curve for HTA and HTA-580 condition.
